# Supplementary material for: Unleashing the Influence of cAMP Receptor Protein: The Master Switch of Bacteriocin Export in Pectobacterium carotovorum subsp. carotovorum
Source: MDPI journal article supplement (doi:10.3390/ijms24119752), 2023-06-05
Supplement: s1 [file s1]

**Supplementary Table S1.** Primers used in this study.

| <b>Primer</b>         | <b>Sequence (5'-3')</b>                     |
|-----------------------|---------------------------------------------|
| CRP-forward-primer    | AGGAG GATCC CGAAT GGTTC                     |
| CRP-reverse-primer    | GCGAC AAAGC TTTAG CGAG                      |
| CRP-sens1             | AGGAGGATCCCGAATGGTTC                        |
| CRP-antisens1         | GCGACAAAGCTTTAGCGAG                         |
| Biotin-CAP site 1     | GATATTTAAAATCAGTTTATTAACGTGTGTT (5'-Biotin) |
| complement-CAP site 1 | AACACAGTTAATAAACTGATTTTAAATATC              |
| Biotin-CAP site 2     | ATACAGACATGGCATTITTTGATGGAGAAC (5'-Biotin)  |
| complement-CAP site 2 | GTTCTCCATCAAAAAATGCCATGTCTGTAT              |
| caro-S3K-forward      | ATGAT TAAGT ACCGT TTATA TGCTC               |
| caro-S3K-reverse      | TCATT GCGAC TCCCT CATAT                     |
| PCC_DGC_F_upstream    | CTCAC TGTTG CTGAC ATGC                      |
| PCC_DGC_R_downstream  | ATTCA GGCAA CTTCG GTTC                      |
| 16s-forward           | CTGGA CAAAG ACTGA CGCTC                     |
| 16s-reverse           | CGCTG GCAAC AAAGG ATAAG                     |
